# Supplementary material for: Synthesis and characterization of quaternized agar in KOH/urea aqueous solution
Source: Royal Society of Chemistry journal article supplement (doi:10.1039/d0nj03412f), 2020-01-01
Supplement: d0nj03412f1.pdf [file d0nj03412f1.pdf]

**Supporting information for**

**Synthesis and characterization of quaternized agar in KOH/urea aqueous solution**

Fuyuan Ding<sup>a,\*</sup>, Yuye Zhong<sup>b,\*</sup>, Shuping Wu<sup>c</sup>, Xinghai Liu<sup>b</sup>, Xiaobo Zou<sup>a</sup>, Houbin Li<sup>b,\*</sup>

<sup>a</sup>School of Food and Biological Engineering, Jiangsu University, Zhenjiang, 212013, China

<sup>b</sup>School of Printing and Packaging, Wuhan University, Wuhan, 430079, China

<sup>c</sup>Research School of Polymeric Materials, School of Materials Science & Engineering, Jiangsu University, Zhenjiang, Jiangsu Province, 212013, China

\*Corresponding author, +86-027-68778489, dingfuyuan@ujs.edu.cn (F.D)

+86-027-68778489, 2013301750088@whu.edu.cn (Y.Z)

+86-027-68778489, lhb@whu.edu.cn (H.L)

**SEM characterization of quaternized agar**

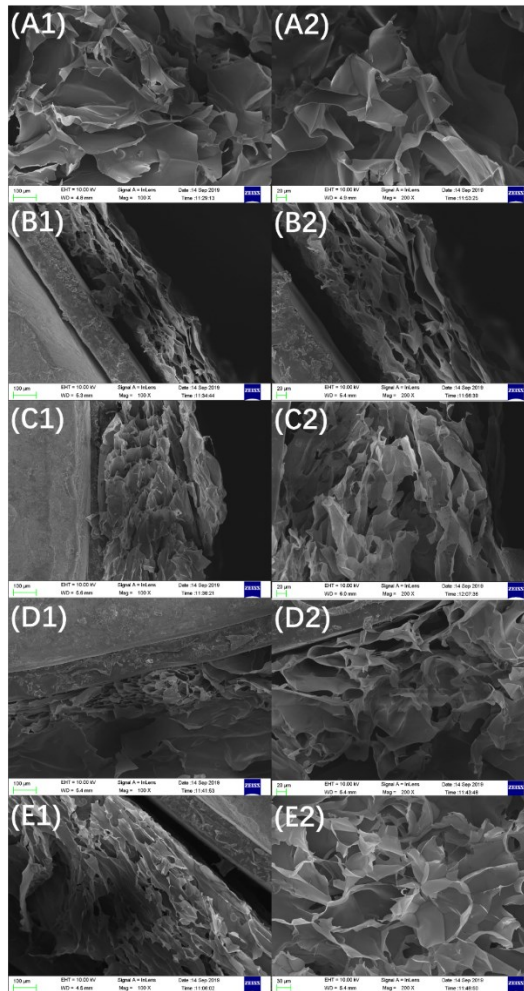

**Fig. S1.** SEM images of agar (A1, A2), QA1 (B1, B2), QA2 (C1, C2), QA3 (D1, D2) and QA4 (E1, E2).

### Optical images of gelling and melting of quaternized agar

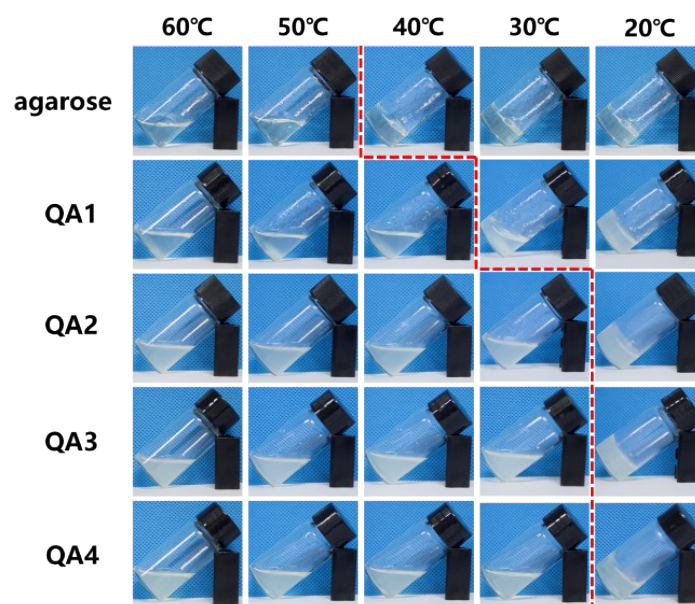

**Fig. S2.** Photographs of gelation of agar and QAs against different temperature.

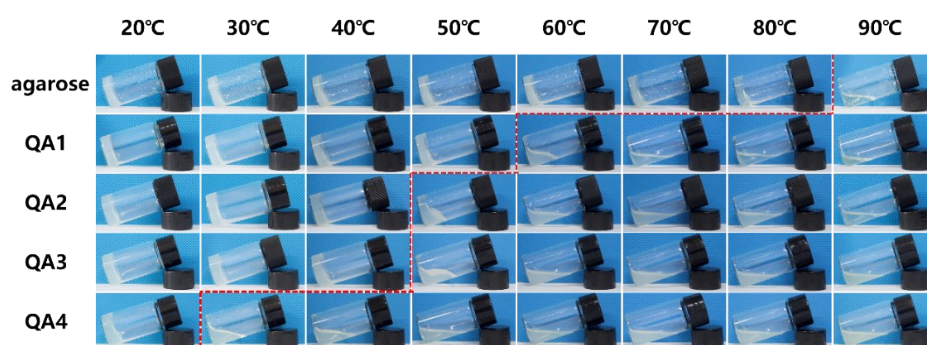

**Fig. S3.** Photographs of dissolution of agar and QAs against different temperature.

**Table S1** The gelling and melting temperature of the samples

| Sample ID | Melting temperature (°C) | Gelling temperature (°C) |
|-----------|--------------------------|--------------------------|
| QA1       | 65.5±1.8                 | 32.9±1.0                 |
| QA2       | 61.8±1.1                 | 31.5±0.5                 |
| QA3       | 58.7±1.5                 | 30.6±0.4                 |
| QA4       | 52.8±0.8                 | 24.5±0.6                 |
